# Supplementary material for: Elucidating the impact of organic amendments on soil bacterial communities and strawberry yield in North Carolina
Source: Frontiers journal article supplement (doi:10.3389/fsufs.2025.1550106), 2025-03-19
Supplement: Table_2.xlsx [file Table_2.xlsx]

## Sheet: 2019
Supplementary Table S2. Analysis of similarity (ANOSIM). In ANOMIS data analysis, a comparison between a probability value (P) and an average correlation coefficient (R2) between the two treatments in 2019.
Vs_group	Df	Sums of Sqs	MeanSqs	F.Model	R2	Pr(>F)		Group	R-value	P-value
Group1-Group3	3	0.37719(0.56922)	0.37719(0.14231)	2.6506	0.39855(0.60145)	0.1		Group3-Group4	0.1296	0.3			S
Group1-Group4	3	0.39800(0.37845)	0.39800(0.09461)	4.2067	0.51259(0.48741)	0.1		Group2-Group4	0.2593	0.2
Group1-Group5	3	0.42491(0.37721)	0.42491(0.09430)	4.5058	0.52973(0.47027)	0.1		Group2-Group3	0.1481	0.3
Group1-Group2	3	0.31054(0.43222)	0.31054(0.10805)	2.8739	0.41809(0.58191)	0.1		Group1-Group4	1	0.1
Group3-Group4	3	0.20301(0.57265)	0.20301(0.14316)	1.4181	0.26173(0.73827)	0.1014		Group1-Group3	0.8519	0.1
Group3-Group5	3	0.13987(0.57141)	0.13987(0.14285)	0.97911	0.19664(0.80336)	0.4014		Group1-Group2	0.963	0.1
Group3-Group2	3	0.18726(0.62642)	0.18726(0.15660)	1.1957	0.23014(0.76986)	0.2014		Group5-Group4	0.4074	0.2
Group4-Group5	3	0.14253(0.38064)	0.14253(0.09516)	1.4978	0.27243(0.72757)	0.2		Group5-Group3	-0.03704	0.7
Group4-Group2	3	0.15454(0.43565)	0.15454(0.10891)	1.419	0.26185(0.73815)	0.2		Group5-Group2	0.2222	0.3
Group5-Group2	3	0.17716(0.43441)	0.17716(0.10860)	1.6313	0.28968(0.71032)	0.1014		Group5-Group1	1	0.1
									0.494446	0.24
Grouping:
Pic-Clor 60 (Pic 60 or PC)	Black mulch	196.15 kg/ha	Group 1
No fumigation and no organic amendments or non-treated control (NTC)	Black mulch		Group 2
Dried molasses full rate (MS)	Black mulch	5.6 t/ha	Group 3
Mustard meal full rate (MM)	Black mulch	2.24 t/ha	Group 4
Dried molasses half-rate + mustard half-rate (½ MS + ½ MM)	Black mulch	2.8 t/ha + 1.12 t/ha	Group 5

## Sheet: 2020
Supplementary Table S2. Analysis of similarity (ANOSIM). In ANOMIS data analysis, a comparison between a probability value (P) and an average correlation coefficient (R2) between the two treatments in 2020.
Vs_group	Df	Sums of Sqs	MeanSqs	F.Model	R2	Pr(>F)		S	R-value	P-value
Group3-Group5	3	0.08366(0.36700)	0.083658(0.091751)	0.9118	0.18563(0.81437)	0.6		Group3-Group5	0	0.5
Group3-Group2	3	0.08157(0.35400)	0.081568(0.088500)	0.92167	0.18727(0.81273)	0.4014		Group1-Group5	0	0.7
Group3-Group4	3	0.05478(0.38239)	0.054776(0.095597)	0.57299	0.1253(0.8747)	0.9014		Group1-Group3	0.07407	0.4
Group3-Group1	3	0.11739(0.44750)	0.11739(0.11188)	1.0493	0.20781(0.79219)	0.2014		Group4-Group5	-0.4444	0.9
Group5-Group2	3	0.08099(0.31792)	0.080990(0.079481)	1.019	0.20303(0.79697)	0.5		Group4-Group3	-0.4074	1
Group5-Group4	3	0.04995(0.34631)	0.049948(0.086579)	0.57691	0.12605(0.87395)	0.9		Group4-Group1	-0.1852	0.9
Group5-Group1	3	0.10715(0.41143)	0.10715(0.10286)	1.0417	0.20662(0.79338)	0.6		Group2-Group5	-0.07407	0.7
Group2-Group4	3	0.06079(0.33331)	0.060791(0.083328)	0.72954	0.15425(0.84575)	1		Group2-Group3	-0.07407	0.6
Group2-Group1	3	0.06600(0.39842)	0.066003(0.099606)	0.66264	0.14212(0.85788)	0.9		Group2-Group1	-0.03704	0.6
Group4-Group1	3	0.08949(0.42681)	0.08949(0.10670)	0.83868	0.17333(0.82667)	0.8		Group2-Group4	-0.2222	1
									-0.137031	0.73
Grouping:
Pic-Clor 60 (Pic 60 or PC)	Black mulch	196.15 kg/ha	Group 1
No fumigation and no organic amendments or non-treated control (NTC)	Black mulch		Group 2
Dried molasses full rate (MS)	Black mulch	5.6 t/ha	Group 3
Mustard meal full rate (MM)	Black mulch	2.24 t/ha	Group 4
Dried molasses half-rate + mustard half-rate (½ MS + ½ MM)	Black mulch	2.8 t/ha + 1.12 t/ha	Group 5

## Sheet: 2021
Supplementary Table S2. Analysis of similarity (ANOSIM). In ANOMIS data analysis, a comparison between a probability value (P) and an average correlation coefficient (R2) between the two treatments in 2021.
Vs_group	Df	SumsOfSqs	MeanSqs	F.Model	R2	Pr(>F)		Group	R-value	P-value
Group2-Group3	3	0.046103(0.212858)	0.046103(0.053214)	0.86636	0.17803(0.82197)	0.6014		Group1-Group4	-0.07407	0.8
Group2-Group1	3	0.10049(0.45292)	0.10049(0.11323)	0.88747	0.18158(0.81842)	0.6014		Group3-Group4	-0.2222	0.9
Group2-Group4	3	0.051682(0.232194)	0.051682(0.058049)	0.89032	0.18206(0.81794)	0.7		Group3-Group1	0	0.6
Group2-Group5	3	0.062088(0.234797)	0.062088(0.058699)	1.0577	0.20913(0.79087)	0.6		Group5-Group4	-0.4815	1
Group3-Group1	3	0.11234(0.50038)	0.11234(0.12510)	0.89804	0.18335(0.81665)	0.8		Group5-Group1	-0.2593	1
Group3-Group4	3	0.04212(0.27965)	0.042122(0.069914)	0.60248	0.1309(0.8691)	1		Group5-Group3	-0.2593	0.9
Group3-Group5	3	0.04679(0.28226)	0.046793(0.070564)	0.66312	0.14221(0.85779)	0.8014		Group2-Group4	0.07407	0.4
Group1-Group4	3	0.11834(0.51972)	0.11834(0.12993)	0.91082	0.18547(0.81453)	0.7014		Group2-Group1	-0.1481	0.9
Group1-Group5	3	0.10560(0.52232)	0.10560(0.13058)	0.80867	0.16817(0.83183)	0.9014		Group2-Group3	-0.03704	0.7
Group4-Group5	3	0.03981(0.30159)	0.039807(0.075398)	0.52795	0.1166(0.8834)	0.8014		Group2-Group5	0	0.6
									-0.140744	0.78
Grouping:
Pic-Clor 60 (Pic 60 or PC)	Black mulch	196.15 kg/ha	Group 1
No fumigation and no organic amendments or non-treated control (NTC)	Black mulch		Group 2
Dried molasses full rate (MS)	Black mulch	5.6 t/ha	Group 3
Mustard meal full rate (MM)	Black mulch	2.24 t/ha	Group 4
Dried molasses half-rate + mustard half-rate (½ MS + ½ MM)	Black mulch	2.8 t/ha + 1.12 t/ha	Group 5

## Sheet: 2022
Supplementary Table S2. Analysis of similarity (ANOSIM). In ANOMIS data analysis, a comparison between a probability value (P) and an average correlation coefficient (R2) between the two treatments in 2022.
Vs_group	Df	SumsOfSqs	MeanSqs	F.Model	R2	Pr(>F)		Group	R-value	P-value
Group3-Group2	3	0.048866(0.201687)	0.048866(0.033614)	1.4537	0.19503(0.80497)	0.097	.	Group3-Group4	0.4583	0.025
Group3-Group1	3	0.17584(0.32381)	0.175836(0.064763)	2.7151	0.35192(0.64808)	0.001		Group1-Group4	0.3704	0.057
Group3-Group4	3	0.09921(0.27600)	0.099210(0.046001)	2.1567	0.26441(0.73559)	0.025		Group1-Group3	0.537	0.02
Group3-Group5	3	0.09459(0.21579)	0.094590(0.035966)	2.63	0.30475(0.69525)	0.028		Group5-Group4	0.1354	0.171
Group2-Group1	3	0.16958(0.32252)	0.169578(0.064504)	2.629	0.3446(0.6554)	0.001		Group5-Group3	0.625	0.019
Group2-Group4	3	0.07745(0.27471)	0.077451(0.045785)	1.6916	0.21993(0.78007)	0.001		Group5-Group1	0.6111	0.03
Group2-Group5	3	0.063754(0.214501)	0.063754(0.035750)	1.7833	0.22912(0.77088)	0.034		Group2-Group4	0.4167	0.029
Group1-Group4	3	0.14151(0.39684)	0.141506(0.079368)	1.7829	0.26285(0.73715)	0.071	.	Group2-Group3	0.08333	0.299
Group1-Group5	3	0.18287(0.33663)	0.182867(0.067325)	2.7162	0.35201(0.64799)	0.034		Group2-Group1	0.5556	0.034
Group4-Group5	3	0.05095(0.28882)	0.050949(0.048136)	1.0584	0.14995(0.85005)	0.361		Group2-Group5	0.375	0.063
									0.416783	0.0747
Grouping:
Pic-Clor 60 (Pic 60 or PC)	Black mulch	196.15 kg/ha	Group 1
No fumigation and no organic amendments or non-treated control (NTC)	Black mulch		Group 2
Dried molasses full rate (MS)	Black mulch	5.6 t/ha	Group 3
Mustard meal full rate (MM)	Black mulch	2.24 t/ha	Group 4
Dried molasses half-rate + mustard half-rate (½ MS + ½ MM)	Black mulch	2.8 t/ha + 1.12 t/ha	Group 5
